# Supplementary material
Source: HighWire-hosted journal article supplement (https://qualitysafety.bmj.com/highwire/filestream/161474/field_highwire_adjunct_files/1/bmjqs-2021-013864supp002_data_supplement.pdf)
Supplement: bmjqs-2021-013864supp002_data_supplement.pdf [file bmjqs-2021-013864supp002_data_supplement.pdf]

**Supplementary material**  
**Effect of clinical peer review on mortality**  
**in patients ventilated >24h: cluster-randomized controlled trial**

Table of contents

|                                                                           |   |
|---------------------------------------------------------------------------|---|
| Description of IQM clinical peer review process.....                      | 2 |
| Figure S1 Throughput model of Peer Review.....                            | 4 |
| Table S1 Definition of patient population and subgroups .....             | 5 |
| Table S2 Number of included hospitals and cases by subgroup analysis..... | 6 |
| Table S3 Contents of implemented measures .....                           | 7 |

## Description of IQM clinical peer review process

IQM is an association aiming to improve inpatient care in member hospitals. IQM membership is voluntary without any regulatory requirements. Participation in clinical peer review (PR) is compulsory for all IQM member hospitals. In addition to participating in clinical PR, members are required to provide and publish accounting data for assessment and comparison of patient outcomes between member hospitals.

The IQM clinical PR is highly standardized. A steering group is responsible for supervision and continuous development of the IQM clinical PR and for development of indicators (“tracers”), which are used to trigger a clinical PR.

The clinical PR has three stages, each including different steps:

1. Preparation (case selection, self-assessment, and clinical PR analysis of selected cases)
2. Implementation (external, on-site assessment, dialogue between reviewers and hospital staff, discussion and approval of sustainable and achievable measures)
3. Follow-Up (report, action plan)

1. Preparation: Preparation includes the selection of IQM member hospitals for clinical PR based on a tracer, an analysis of the selected (patient) cases and a self-assessment by the hospitals chosen for clinical PR.

The IMPRESS study aimed to analyze the effectiveness of clinical PR regarding mortality in patients with ventilation >24h (tracer). Therefore, clinical PRs were initiated in hospitals with mortality rates above average in this tracer. All these tracers are predefined in the continuously updated German Inpatient Quality Indicator (G-IQI) Set. The mortality of patients ventilated >24h is defined as indicator 56.1 G-IQI (1).

After selection of member hospitals for clinical PR, IQM forms a clinical PR team including physicians and nurses with different positions and qualifications to analyze the indication covered by clinical PR. With respect to ventilation >24h, the clinical PR team includes physicians and nurses specialized in e.g. anesthesiology, pneumology or emergency care. To become a professional peer, it is obligate to become certified. Certification as a professional peer requires educational courses based on a structured curriculum of the German Medical Association and training sessions in two clinical PRs. The hospital chosen for clinical PR compiles a case list. After selection of cases, an assessment by the peers and self-assessment by the hospitals follows in advance of the external on-site assessment.

2. Implementation: After the preparatory (self-)assessment of the cases, the preparation of necessary case files, and access to the hospital information system, the clinical PR team conducts an on-site assessment. After analyzing patient data for systematic improvement potentials, these potentials are discussed with staff responsible for patient care. As mentioned above, this especially includes physicians from different disciplines and nurses. At the end of the clinical PR, responsible hospital staff and clinical PR team define achievable and sustainable measures, as required for the peer review report. The main challenge of this report is to define clear and precisely formulated potentials for improvement to derive an action plan. The visited hospital is responsible for both this action plan and its implementation.

3: Follow-Up: A report with the consented measures is sent to the participating hospital and IQM. All potentials of improvement are summarized for the management of the hospital to inform and to foster implementation of measures for improvement. The hospital departments involved in the clinical PR

receive a report including all relevant issues revealed during clinical PR to define an action plan for improvement.

The protocols evaluate the following criteria based on a scoring system:

- adequate and prompt diagnostics as well as treatment
- prompt and targeted examination of treatment process
- adequate and prompt indication
- guideline adherence
- control of the course of treatment
- conflict-free interdisciplinary and interprofessional cooperation
- coherent and complete documentation

Based on these criteria, potentials for improvement and proposals for measures are derived and protocolled in consent between reviewers and hospital staff. Formal criteria such as the completeness of the examined medical records, readability, access, or personnel representation in the peer review are assessed. IQM summarizes reports and evaluates different aspects like satisfaction of the hospitals/departments, process parameters, and main potentials for improvement.

Especially main potentials for improvement are discussed by the steering group and prepared for further presentation to reviewers and members hospitals.

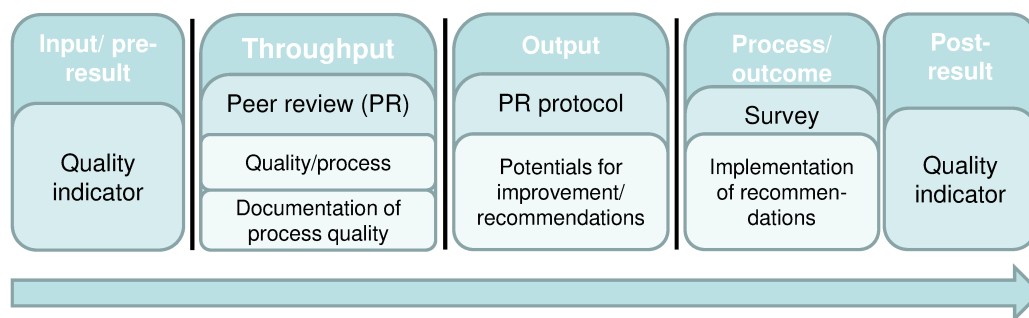

Figure S1 Throughput model of Peer Review

Table S1 Definition of patient population and subgroups

| <b>Group</b>                                | <b>Indication</b>     | <b>Main definition / ICD-10-GM codes / OPS codes</b> | <b>Further inclusion/exclusion criteria</b>                                                                       |
|---------------------------------------------|-----------------------|------------------------------------------------------|-------------------------------------------------------------------------------------------------------------------|
| Total population                            | Ventilation > 24h     | Ventilation for more than 24 hours                   | Age > 27 days                                                                                                     |
| Subgroup: Patients ventilated > 24h with... | Myocardial infarction | Main diagnosis: I21 or I22                           | Age > 19 years                                                                                                    |
|                                             | Stroke                | Main diagnosis: I60, I61, I63, or I64                | Age > 19 years                                                                                                    |
|                                             | COPD                  | Main diagnosis: J44                                  | Age > 19 years, no tumor (C00 – C97, D00 – D09)                                                                   |
|                                             | Pneumonia             | Main diagnosis: A48.1, J10.0, J11.0, or J12 – J18    | Age > 19 years, no tumor (C00 – C97, D00 – D09), no mucoviscidosis (E84, U69.00), no transfer from other hospital |
|                                             | Colorectal resection  | OPS codes: 5-455, 5-456, 5-484, 5-485                | -                                                                                                                 |

Table S2 Number of included hospitals and cases by subgroup analysis

| Study group<br>Study period | Control group    |          |      |                   |          |      | Intervention group |          |      |                   |          |      |
|-----------------------------|------------------|----------|------|-------------------|----------|------|--------------------|----------|------|-------------------|----------|------|
|                             | Pre-Intervention |          |      | Post-Intervention |          |      | Pre-Intervention   |          |      | Post-Intervention |          |      |
| Subgroup                    | Hospitals        | Patients | SMR  | Hospitals         | Patients | SMR  | Hospitals          | Patients | SMR  | Hospitals         | Patients | SMR  |
| Myocardial infarction       | 22               | 291      | 1.42 | 5                 | 275      | 1.41 | 19                 | 330      | 1.27 | 7                 | 276      | 1.29 |
| Stroke                      | 18               | 571      | 1.43 | 6                 | 552      | 1.32 | 18                 | 413      | 1.41 | 6                 | 372      | 1.27 |
| COPD                        | 25               | 400      | 0.79 | 4                 | 392      | 0.83 | 26                 | 466      | 0.71 | 4                 | 489      | 0.77 |
| Pneumonia                   | 27               | 499      | 1.11 | 2                 | 488      | 1.00 | 25                 | 441      | 1.06 | 4                 | 521      | 1.02 |
| Colorectal resection        | 17               | 63       | 1.42 | 8                 | 70       | 1.04 | 20                 | 81       | 0.93 | 8                 | 62       | 0.97 |

Table S3 Contents of implemented measures

| Content of measure                                  | n  | %    |
|-----------------------------------------------------|----|------|
| Additional equipment                                | 1  | 1,2  |
| Additional intensive care capacities                | 2  | 2,5  |
| Additional software                                 | 5  | 6,2  |
| Additional staff                                    | 1  | 1,2  |
| Administration                                      | 1  | 1,2  |
| Briefing                                            | 1  | 1,2  |
| Case review                                         | 1  | 1,2  |
| Combined approach                                   | 7  | 8,6  |
| additional staff, director                          |    |      |
| documentation, additional software                  |    |      |
| care strategy, inter-professional care              |    |      |
| qualification, communication, information provision |    |      |
| qualification, director, care strategy              |    |      |
| qualification, documentation                        |    |      |
| qualification, care strategy                        |    |      |
| Documentation                                       | 26 | 32,1 |
| Inter-professional care                             | 6  | 7,4  |
| Care strategy                                       | 16 | 19,8 |
| Organizational structure                            | 1  | 1,2  |
| Qualification                                       | 2  | 2,5  |
| Updated/ additional SOPs                            | 11 | 13,6 |
| Sum of implemented measures                         | 81 |      |

## References

1. Mansky T, Nimptsch U, Cools A, Hellerhoff F. G-IQI German Inpatient Quality Indicators Version 5.0 [Internet]. 2016. Available from: [www.seqmgw.tu-berlin.de/fileadmin/fg241/GIQI\\_V50\\_Band\\_1.pdf](http://www.seqmgw.tu-berlin.de/fileadmin/fg241/GIQI_V50_Band_1.pdf)
